# Supplementary material
Source: ML conference proceedings conference paper supplement (https://www.ecva.net/papers/eccv_2020/papers_ECCV/html/123460103_ECCV_2020_paper.php)
Supplement: Supplementary file 2 [file 123460103-supp.zip › README.txt]

codec of Self6D.mp4: MPEG-4 AVC (Baseline@L4)

download url: https://www.winxdvd.com/resource/avc-codec.htm  
(No need to download on standard Windows 10, Mac, or Ubuntu >= 16.04)
